# Supplementary material for: A novel self-assembly approach for synthesizing nanofiber aerogel supported platinum single atoms
Source: Royal Society of Chemistry journal article supplement (doi:10.1039/d0ta03207g), 2020-01-01
Supplement: d0ta03207g1.pdf [file d0ta03207g1.pdf]

1 **Supporting Information**

2

3 **Title: Novel Self-Assembling Approach for Synthesizing Nanofiber Aerogel Supported**  
4 **Platinum Single Atoms**

5

6 Haojie Zhang,<sup>a,†</sup> Yonghui Zhao,<sup>b,†</sup> Yu Sun,<sup>c</sup> Qing Xu,<sup>b</sup> Ruouo Yang,<sup>d</sup> Hao Zhang,<sup>d</sup> Chao Lin,<sup>a</sup>  
7 Kenich Kato,<sup>e</sup> Xiaopeng Li,<sup>a,\*</sup> Miho Yamauchi<sup>f,g,\*</sup> and Zheng Jiang<sup>d,h,\*</sup>

8

1 **DFT calculation.** To see the possible role of atomistic Pt doping in the crystal framework of  
 2 MnO<sub>2</sub>, we exploit the changes in the geometric and electronic effects by Vienna Ab initio  
 3 Simulation Package (VASP)<sup>S1-3</sup> code based on self-consistent density functional theory (DFT)  
 4 on the experimentally observed MnO<sub>2</sub>(100) surface. Model of Pt doping with atoms  
 5 substituting Mn sites (denoted Sub-Pt-MnO<sub>2</sub>(100)) on the 2×1 MnO<sub>2</sub>(100) surface. Throughout  
 6 all the computations, the spin-polarized calculations were carried out because of the  
 7 ferromagnetic manner of Mn atoms. The PBEsol (Perdew–Burke–Ernzerhof revised for  
 8 solids)<sup>S4</sup> parameterization version of the generalized gradient approximation (GGA) was used  
 9 to incorporate exchange and correlation energies. A DFT plus Hubbard model (DFT +U)<sup>S5</sup> of  
 10 U<sub>eff</sub> = 1.6 eV was applied to the Mn d states, which were used in Ref<sup>S6</sup>. In order to avoid the  
 11 artificial interactions between the surface and its periodic images, a vacuum thickness of 13 Å  
 12 was added in the slab cell along the direction perpendicular to the surface. For the Brillouin  
 13 zone integration, a 2 × 4 × 1 Monkhorst–Pack<sup>S7</sup> k-point mesh was used. The self-consistent  
 14 calculations were repetitively performed until the forces fell below 0.03 eVÅ<sup>-2</sup> was performed  
 15 to incorporate surface relaxation effects.

16

17 The ORR may proceed through the following elementary steps, and they were considered in  
 18 the current work:

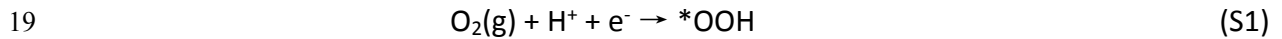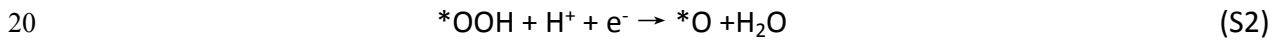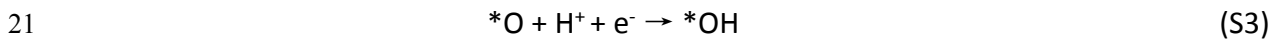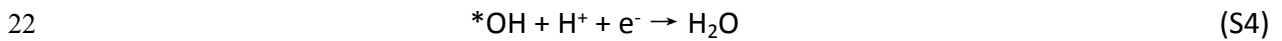

23 where (g) and \* represents the gaseous phase and adsorption state, respectively. The  
 24 adsorption free energy for each species (X = O\*, OH\*, OOH\* and H\*) was calculated according  
 25 to the formula:

26 
$$G_X = E_X + E_{\text{ZPE}} - TS \quad (\text{S5})$$

27 where E<sub>X</sub> is the DFT calculated total energy, E<sub>ZPE</sub> is the zero-point energy. All the adsorption  
 28 free energy G<sub>X</sub> (X = O\*, OH\*, OOH\* and H\*) are relative to the free energy of stoichiometrically

1 appropriate amounts of H<sub>2</sub>O (g) and H<sub>2</sub>(g). Given that the high-spin ground state of the oxygen  
2 molecule is poorly described in DFT calculations, the free energy of the O<sub>2</sub> molecule was  
3 derived according to  $G_{\text{O}_2}(\text{g}) = 2G_{\text{H}_2\text{O}}(\text{g}) - 2G_{\text{H}_2}(\text{g}) + 4 \times 1.23$  (eV). For each elementary step, the  
4 Gibbs reaction free energy  $\Delta G$  is calculated according to the formula:

$$5 \quad \Delta G = \Delta E + \Delta ZPE - T\Delta S \quad (\text{S5})$$

6 where  $\Delta E$  is the reaction energy of reactant and product molecules adsorbed on the catalyst  
7 surface, obtained from DFT calculations;  $\Delta ZPE$  and  $\Delta S$  are the change in zero-point energies  
8 and entropy due to the reaction. Computational hydrogen electrode (CHE) method was used  
9 to calculate the free energy changes of the above elementary steps.<sup>58</sup>

10

11 **ORR catalytic measurements.** The ORR catalytic measurements were carried out on the  
12 Rotating Disk Electrode (RDE, Pine, USA) with the polished glass carbon (Pine, 5 mm diameter,  
13 0.196 cm<sup>2</sup>) as the working electrode. The preparation method of the working electrodes  
14 containing investigated catalysts can be found as follows. In short, 2 mg of catalyst powder  
15 was dispersed in 1/1 (v/v) of water and ethanol mixed solvent with 120  $\mu\text{L}$  of Nafion solution  
16 (5 wt%, Sigma-Aldrich), then the mixture was ultrasonicated for 30 min to generate a  
17 homogeneous ink. Next, 7.5  $\mu\text{L}$  of dispersion was transferred onto the glassy carbon disk,  
18 leading  $\sim 0.68 \mu\text{g}/\text{cm}^2$ . Finally, the as-prepared catalyst film was dried at room temperature.

19

20 Before the electrochemical measurement, the 1 M KOH electrolyte was bubbled O<sub>2</sub> for at least  
21 30 min. The polarization curves were obtained by sweeping the potential from 1.1 to 0.2 V (vs.  
22 RHE) at room temperature at 225, 400, 625, 900, 1025 and 1600 rpm, with a sweep rate of 10  
23 mV/s. The electrochemical impedance spectrum was collected at the 0.8 V (vs. RHE).

24

25 The transferred electron numbers per O<sub>2</sub> involved in the oxygen reduced were determined by  
26 the Koutechy-Levich equation was given below:<sup>59</sup>

$$27 \quad \frac{1}{j} = \frac{1}{j_k} + \frac{1}{B\omega^{0.5}} \quad (\text{S7})$$

1 Where  $j$  is the measured current density,  $j_k$  is the kinetic current of the ORR and  $\omega$  is the  
2 angular velocity,  $\frac{1}{B}$  is the slope of the  $K$ - $L$  plots.

$$B = 0.62nF(D_O)^{2/3}\nu^{-1/6}C_O \quad (S8)$$

4 Where  $n$  represents number of electrons transferred per oxygen molecule,  $F$  is the Faraday  
5 constant ( $F = 96500 \text{ C mol}^{-1}$ ),  $D_O$  is the diffusion coefficient of  $O_2$  in the electrolyte ( $1.9 \times 10^{-5}$   
6  $\text{cm}^2 \text{ s}^{-1}$ ),  $\nu$  is the kinetic viscosity ( $0.01 \text{ cm}^2 \text{ s}^{-1}$ ), and  $C_O$  is the bulk concentration of  $O_2$  ( $1.2 \times 10^{-6}$   
7  $\text{mol cm}^{-3}$ ). The constant 0.2 is adopted when the rotation speed is expressed in rpm.

8

9 The transferred electron number ( $n$ ) and peroxide yield ( $\%H_2O_2$ ) were also measured by the  
10 Rotating Ring Disk Electrode (RRDE, Pine, USA) with a polished E7R9 glass carbon as working  
11 electrode (Pine, collect efficiency 37%). The recipe of the sample ink and catalyst loading was  
12 kept consistent with that of the RDE measurement. The corresponding transferred electron  
13 number and peroxide yield was calculated by the equations as bellow:<sup>S10</sup>

$$n = \frac{4I_d}{I_d + I_r/N} \quad (S9)$$

$$\%H_2O_2 = \frac{4I_r/N}{I_d + I_r/N} \times 100\% \quad (S10)$$

16 Where  $I_d$  and  $I_r$  were the current density of the disk and ring of the RRDE, respectively.  $N$  is the  
17 RRDE collection efficiency, which was determined to be 0.37 herein.

18

19 The kinetic current density was calibrated as bellow,<sup>S9, 11</sup>

$$j_k = \frac{j_d - j}{j_d \times j} \quad (S11)$$

22 Where the  $j_d$  and  $j$  are the diffusion-limited current density and experimentally measured  
23 current density, respectively.  $j_k$  is the calculated kinetic current density. To better understand  
24 the catalytic mechanism, the kinetic current density was normalized to the loading amount of  
25 the Pt in the prepared samples to obtain the mass activities.

26

1

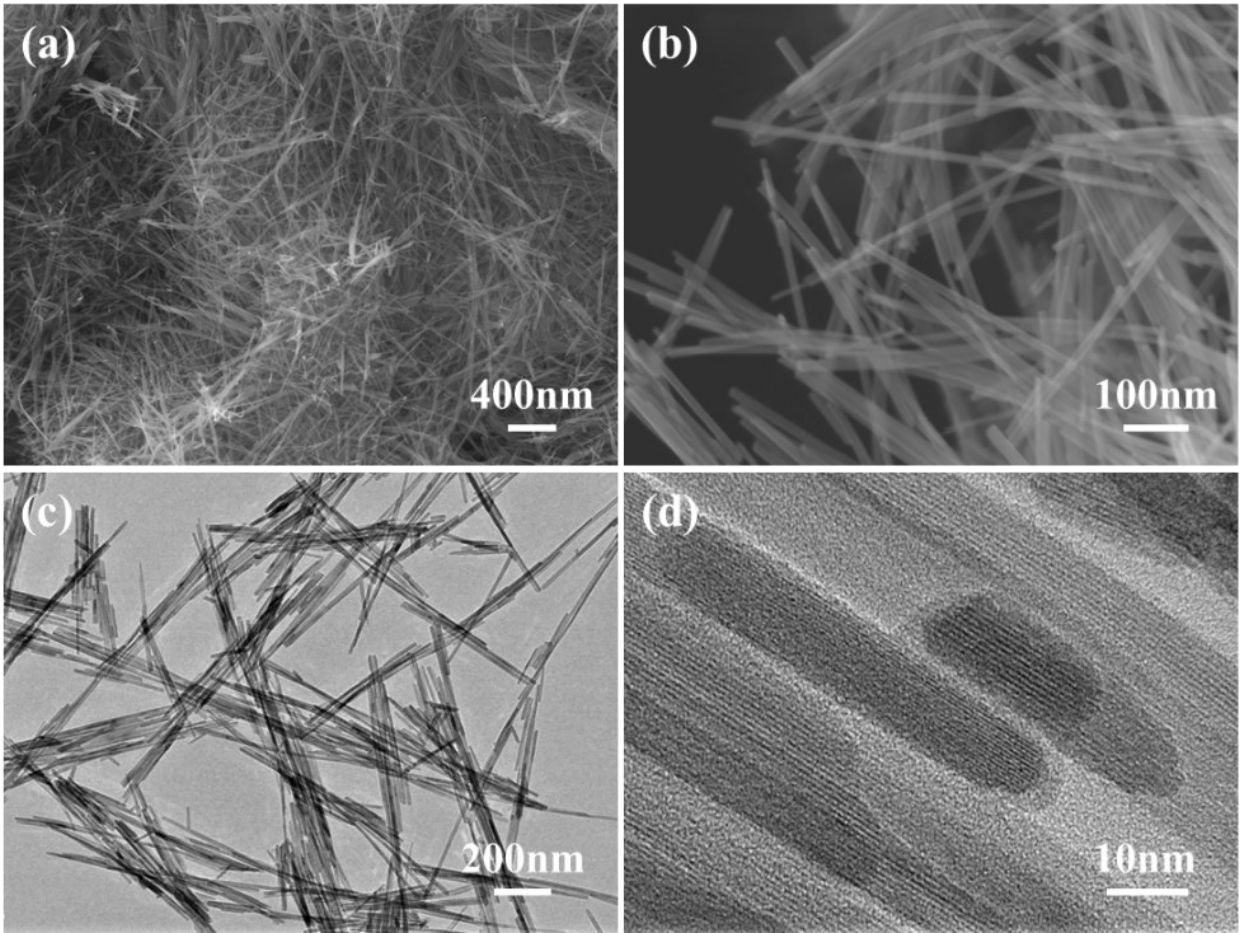

2

3 Fig. S1. (a, b) SEM and (c, d) TEM images of un-doped  $\alpha$ - $\text{MnO}_2$  nanofibers.

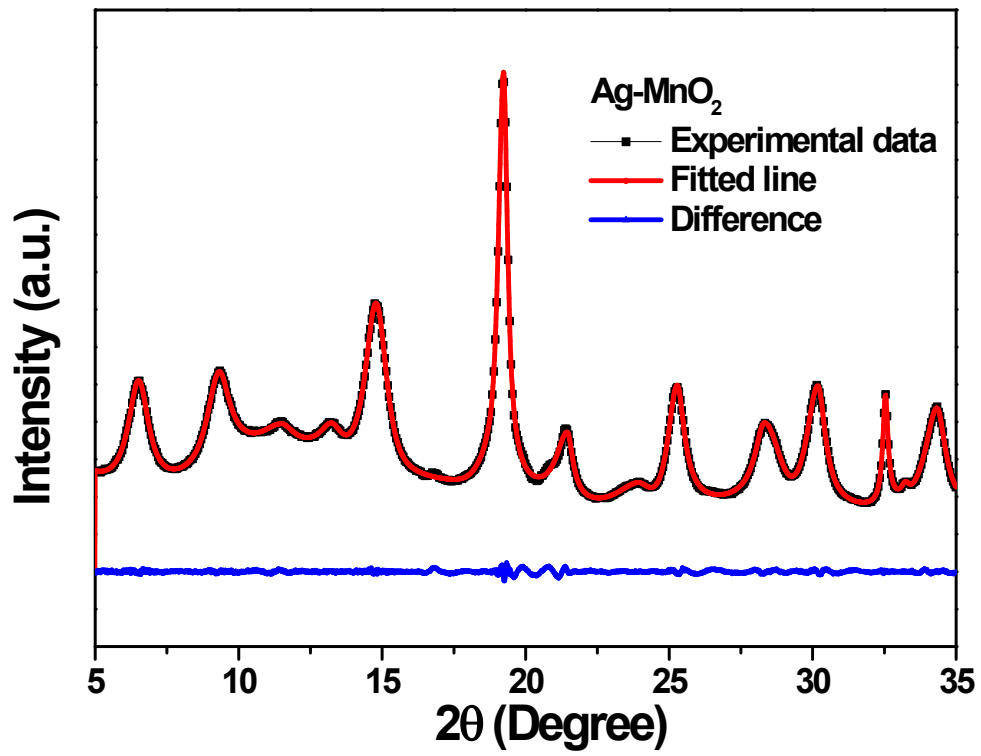

4

1 Fig. S2. SRXRD patterns of the Ag/MnO<sub>2</sub>.

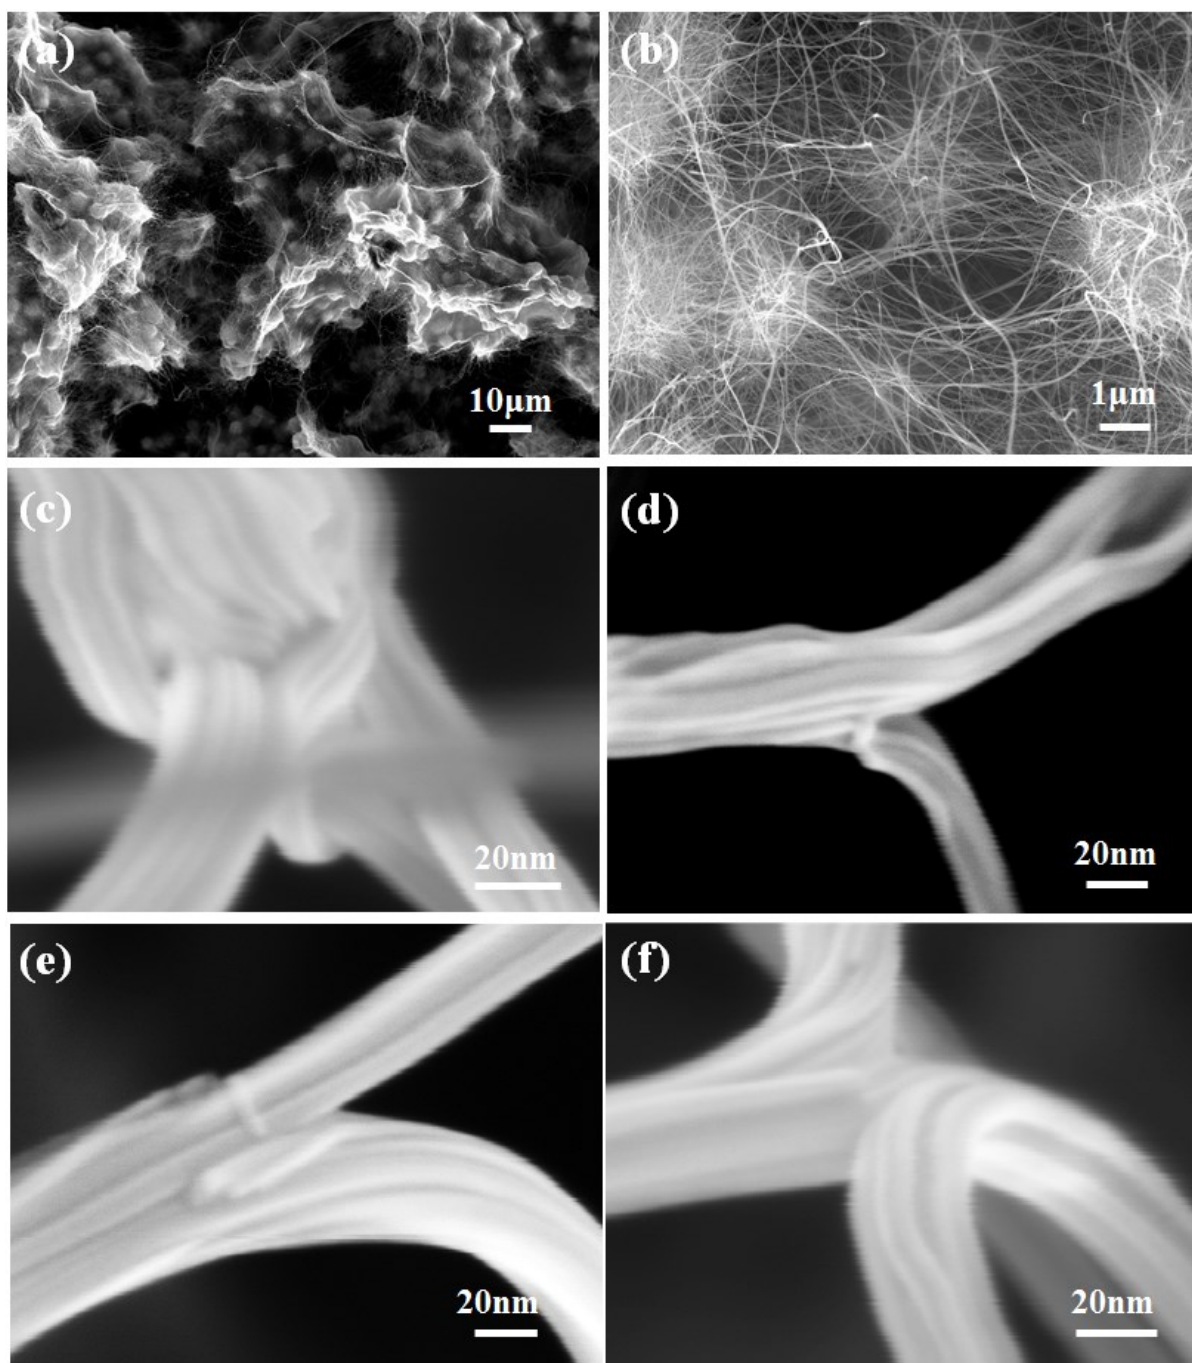

2

3 Fig. S3. (a, b) SEM images of Ag-MnO<sub>2</sub> aerogel at different magnifications. (c-f) show various  
4 bonding patterns between the Ag-MnO<sub>2</sub> nanofibers.

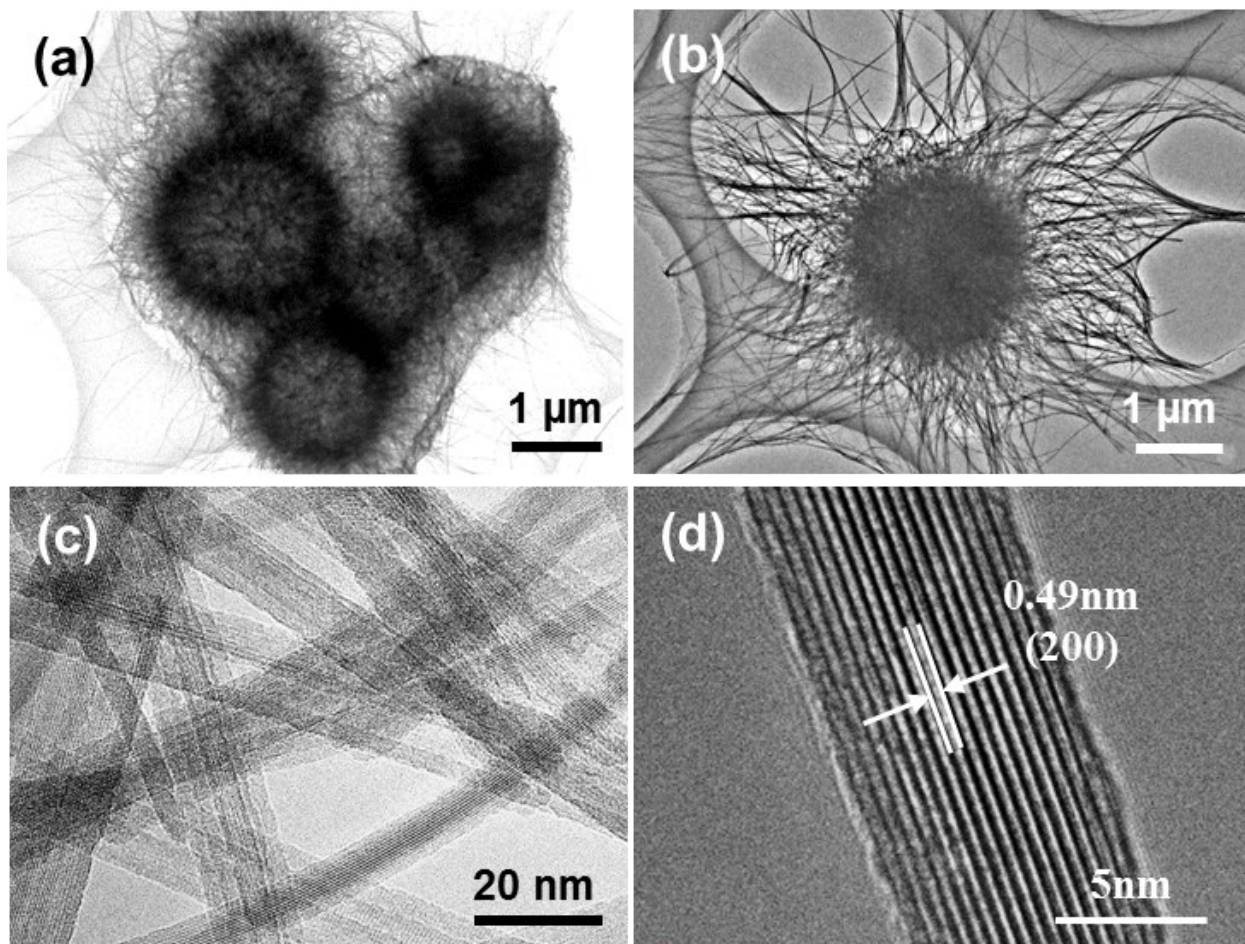

1  
 2 Fig. S4. (a, b) TEM images of the spherical cellular structure in Ag-MnO<sub>2</sub> aerogel. (c, d) high-  
 3 resolution TEM images of the as-prepared MnO<sub>2</sub> nanofibers.

4

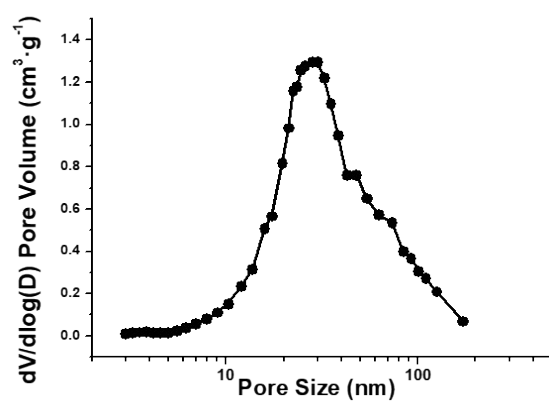

5

6 Fig. S5. The pore size distribution of Ag-MnO<sub>2</sub> aerogel.

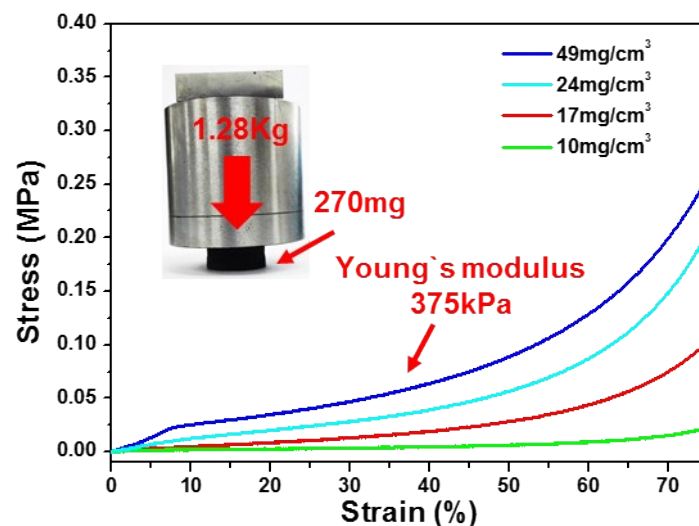

1

2 Fig. S6. Compress test of the aerogel along with the different density. The inset picture  
 3 shows the as prepared aerogel bears  $\times 4740$  weight than its own weight without obvious  
 4 collapse.

5

6

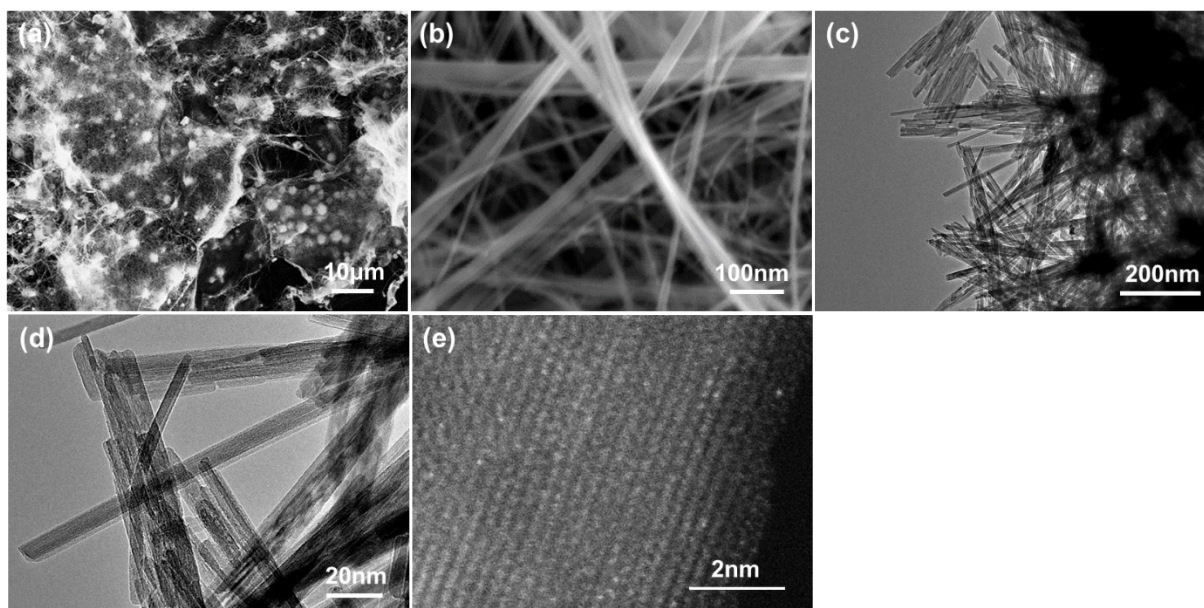

7

8 Fig. S7. (a, b) SEM images and (c, d) TEM images of the Pt/Ag-MnO<sub>2</sub> aerogel. (e) HAADF-STEM  
 9 image of the Pt/Ag-MnO<sub>2</sub> nanofiber.



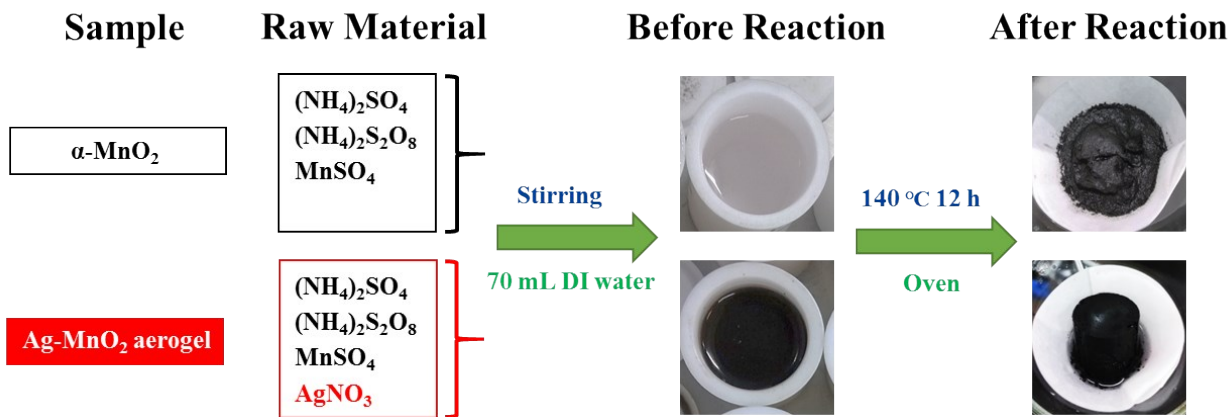

1

2 Fig. S8. Schematic process of preparation of un-doped  $\alpha$ -MnO<sub>2</sub> nanowire powder and Ag-  
3 MnO<sub>2</sub> aerogel.

4

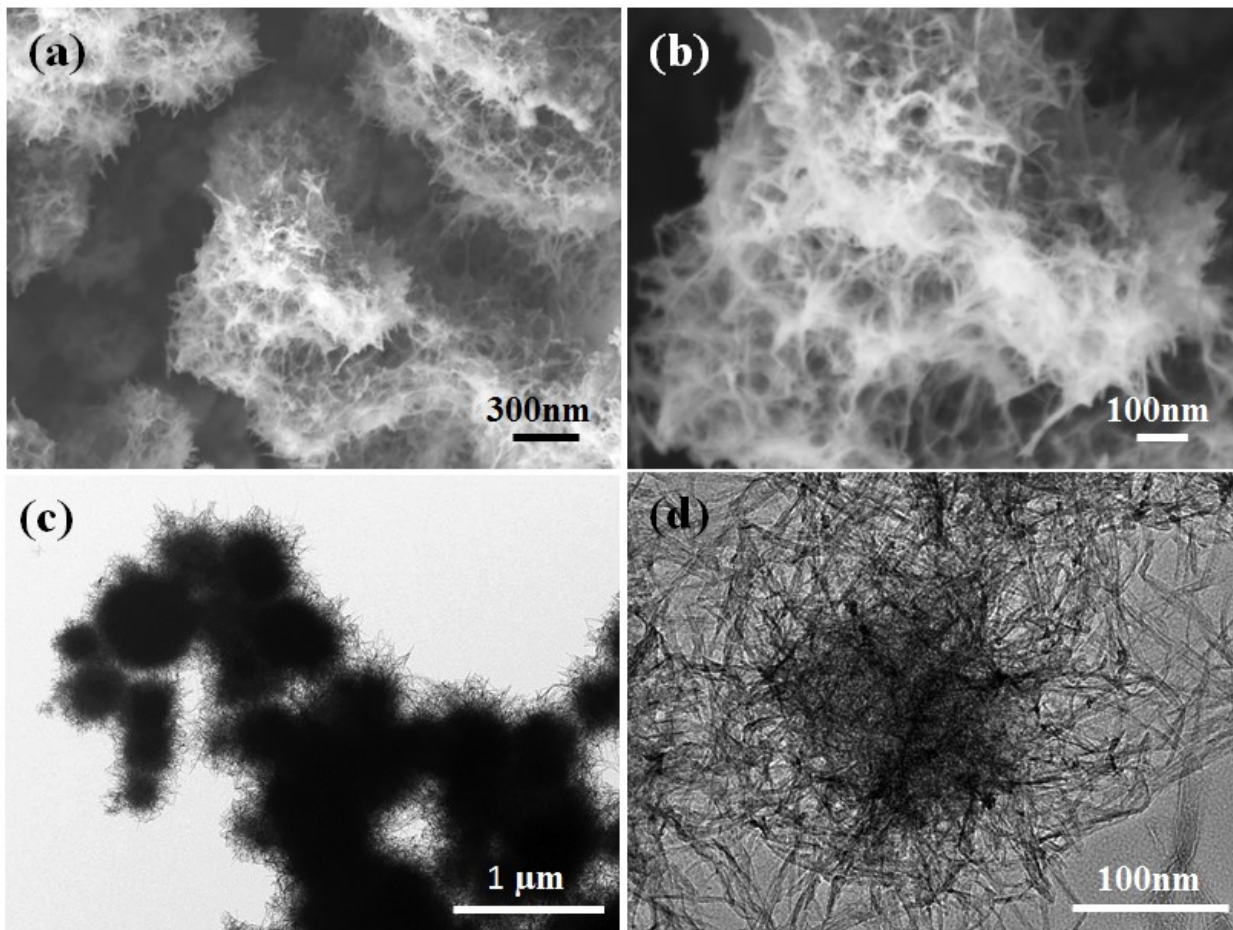

5

6 Fig. S9 (a, b) SEM and (c, d) TEM images of the black Ag-MnO<sub>2</sub> nanofiber precipitates formed  
7 prior to hydrothermal reaction.

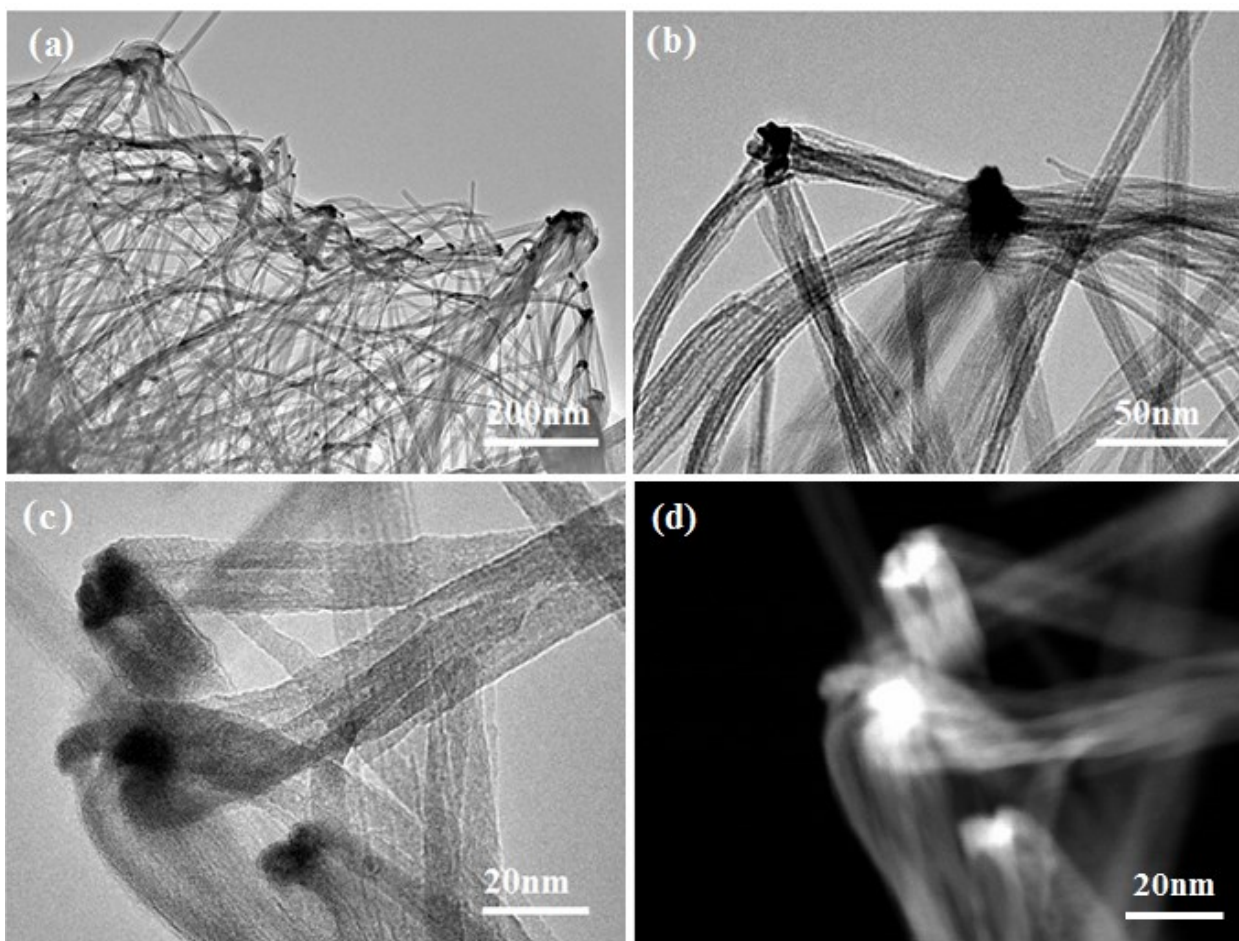

1

2 Fig. S10. (a-c) TEM and (d) HAADF-STEM images of the Ag-MnO<sub>2</sub> aerogel formed at the  
3 hydrothermal reaction time of 6 h.

4

5

6

7

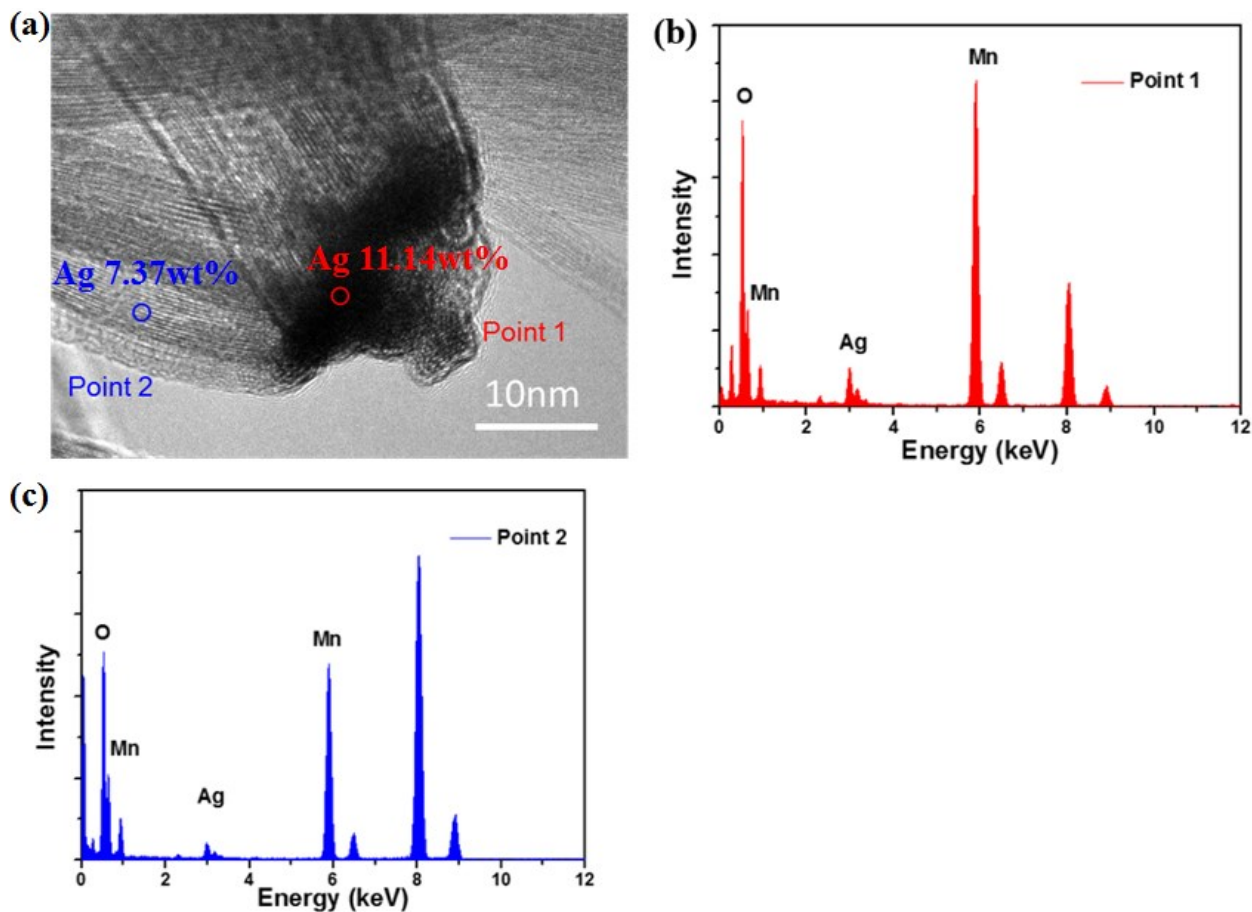

1

2 Fig. S11. (a) TEM view of reaction intermediates of the Ag-MnO<sub>2</sub> aerogel formed at the  
 3 hydrothermal reaction time of 6 h. (b, c) EDS of the point 1 and point 2 in (a).

4

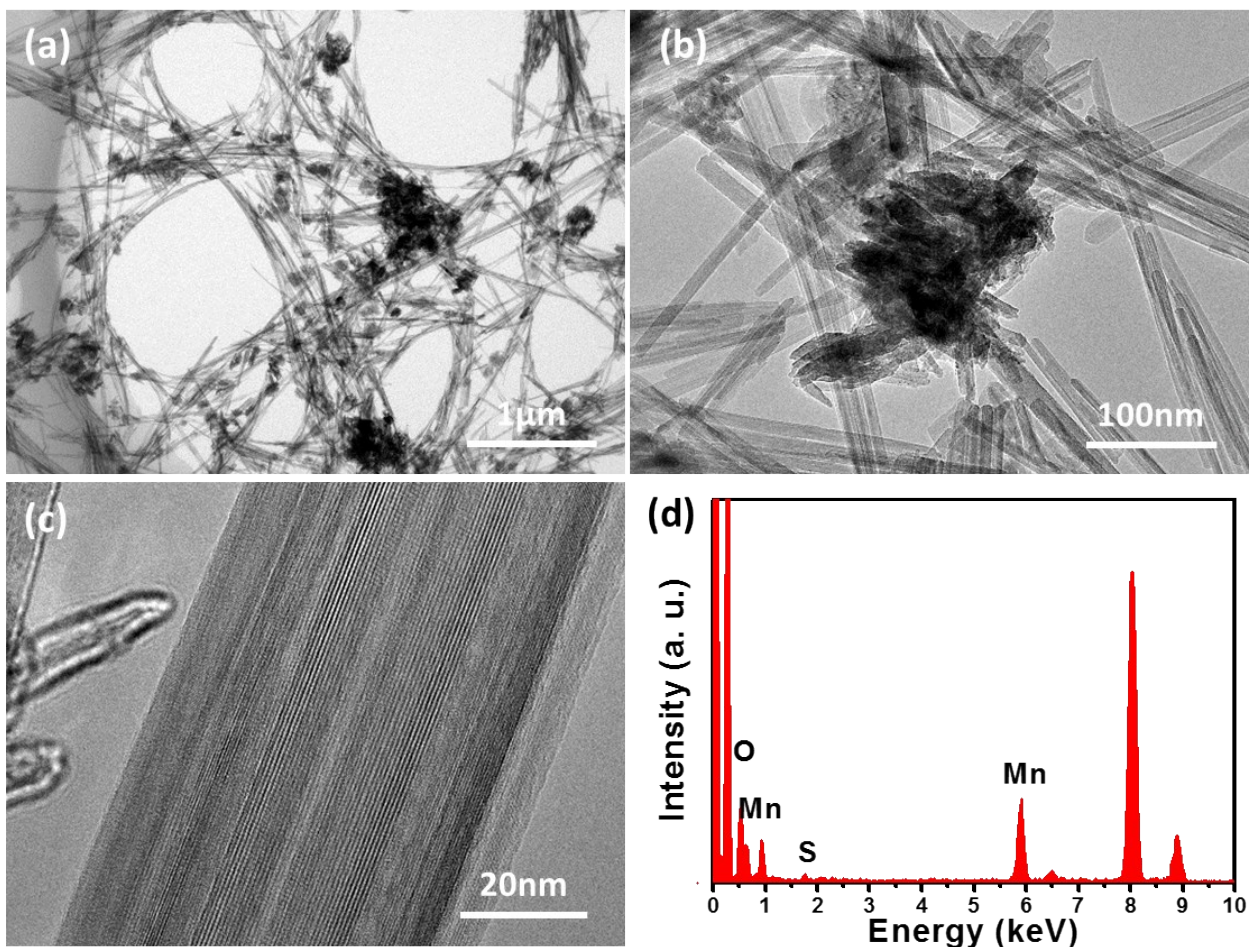

1

2 Fig. S12. (a-c) TEM images of the as-prepared Pt-MnO<sub>2</sub> without AgNO<sub>3</sub>. (d) The corresponding  
3 EDS spectra of the signal nanofiber shown in (c).

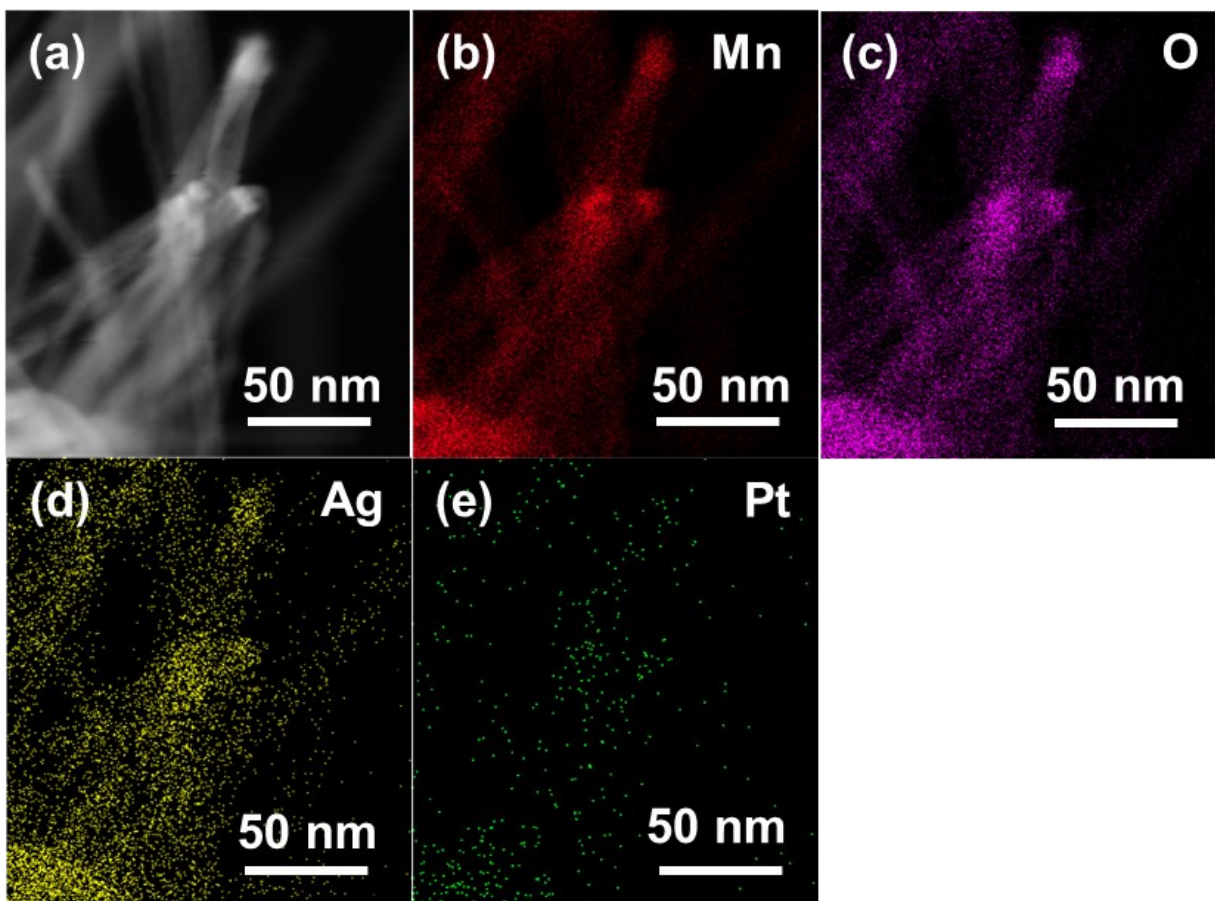

1

2 Fig. S13. EDS mapping of the intermediates during the growth of the Pt/Ag-MnO<sub>2</sub> nanofibers.

3 (a) TEM image (b-c) the corresponding EDS mapping images of the Mn, O, Ag and Pt.

4

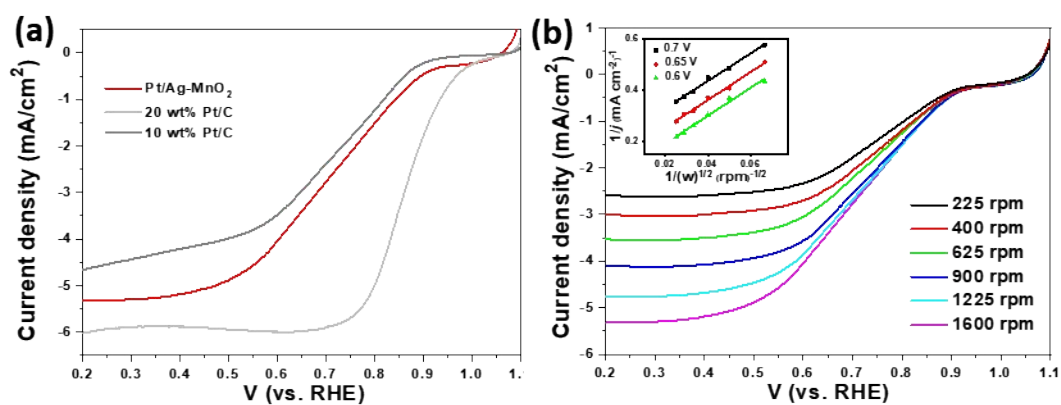

5

6 Fig. S14. (a) ORR polarization curves of Pt/Ag-MnO<sub>2</sub>, 20 wt% Pt/C and 10 wt% Pt/C. (b) Rotating

7 disk electrode voltammograms of Pt/Ag-MnO<sub>2</sub> at various rotational speeds: 225, 400, 625,

8 900, 1225 and 1600 rpm. The K-L plot was shown in the inset image.

9

(a) MnO<sub>2</sub>(100)

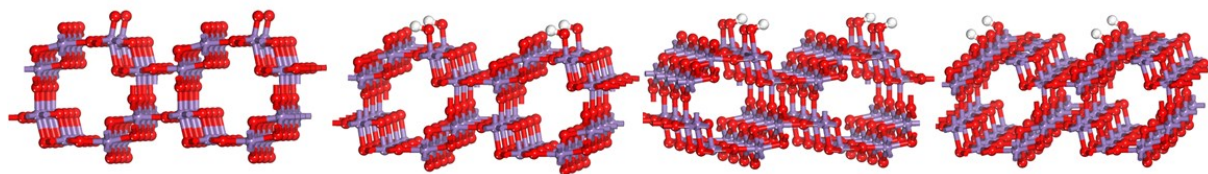

(b) Pt-MnO<sub>2</sub>(100)

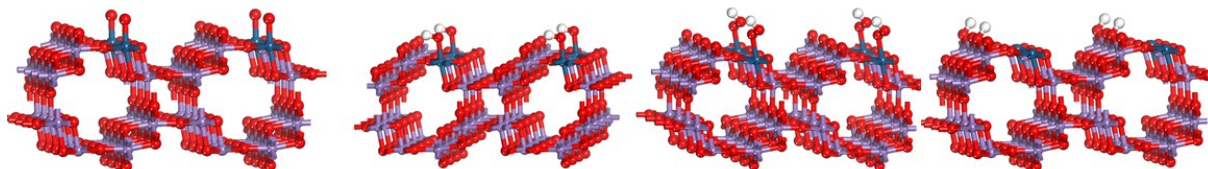

1

2 Fig. S15. Adsorption configurations of different ORR intermediates (O\*, OH\*, OOH\*, H) on (a)  
3 MnO<sub>2</sub>(100) (b) Pt-MnO<sub>2</sub>(100). The purple, blue red and white balls represent Mn, Pt, O and H  
4 atoms, respectively.

5

#### 6 Reference:

7 S1. G. Kresse and J. Furthmüller, *Comput. Mater. Sci.*, 1996, **6**, 15-50.

8 S2. G. Kresse and J. Furthmüller, *Phys. Rev. B*, 1996, **54**, 11169-11186.

9 S3. G. Kresse and J. Hafner, *Phys. Rev. B*, 1993, **47**, 558.

10 S4. J. P. Perdew, A. Ruzsinszky, G. I. Csonka, O. A. Vydrov, G. E. Scuseria, L. A.  
11 Constantin, X. Zhou and K. Burke, *Phys. Rev. Lett.*, 2008, **100**, 136406.

12 S5. V. I. Anisimov, J. Zaanen and O. K. Andersen, *Phys. Rev. B*, 1991, **44**, 943-954.

13 S6. E. Cockayne and L. Li, *Chem. Phys. Lett*, 2012, **544**, 53-58.

14 S7. H. J. Monkhorst and J. D. Pack, *Phys. Rev. B*, 1976, **13**, 5188.

15 S8. J. K. Nørskov, J. Rossmeisl, A. Logadottir, L. Lindqvist, J. R. Kitchin, T. Bligaard and H.  
16 Jónsson, *The Journal of Physical Chemistry B*, 2004, **108**, 17886-17892.

17 S9. C. Lin, S. S. Shinde, Z. Jiang, X. Song, Y. Sun, L. Guo, H. Zhang, J.-Y. Jung, X. Li and  
18 J.-H. Lee, *J. Mater. Chem. A*, 2017, **5**, 13994-14002.

19 S10. J. Zhang, Z. Xia and L. Dai, *Science Advances*, 2015, **1**, e1500564.

20 S11. B. Lim, M. Jiang, P. H. Camargo, E. C. Cho, J. Tao, X. Lu, Y. Zhu and Y. Xia, *Science*,  
21 2009, **324**, 1302-1305.

22
